# Supplementary material
Source: HighWire-hosted journal article supplement (https://www.cmajopen.ca/highwire/filestream/90351/field_highwire_adjunct_files/1/open-2022-0163-2-at.pdf)
Supplement: open-2022-0163-2-at.pdf [file open-2022-0163-2-at.pdf]

**Supplementary Table 2: Diagnoses and ICD codes excluded from analysis due to increased risk of dyslipidemia**

| <b>Diagnosis</b>              | <b>ICD Code(s)</b> |
|-------------------------------|--------------------|
| Hypothyroidism                | E03                |
| Diabetes                      | E10, E11,<br>E13   |
| Chronic kidney disease        | N18                |
| Hemolytic uremic syndrome     | D59                |
| Nephrotic syndrome,           | N04                |
| Alagille syndrome             | Q44                |
| Systemic lupus erythematosus  | N32                |
| Juvenile rheumatoid arthritis | M08                |
| Glycogen-storage disease      | E74                |
| Gaucher disease               | E75                |
| Cystine-storage disease       | E72                |
| Juvenile Tay-Sachs disease,   | E75                |
| Niemann-Pick disease          | E75                |
| Organ transplantation         | T86                |
| Progeria                      | E34                |
| Childhood cancer              | C00-D49            |
